# Supplementary material for: Efficacy of tezepelumab in patients with severe asthma and persistent airflow obstruction
Source: PubMed Central journal article supplement (PMC11587167; doi:10.1183/23120541.00164-2024), 2024-11-25
Supplement: 00164-2024.SUPPLEMENT.pdf [file 00164-2024.SUPPLEMENT.pdf]

# Efficacy of tezepelumab in patients with severe asthma and persistent airflow obstruction

## Supplementary material

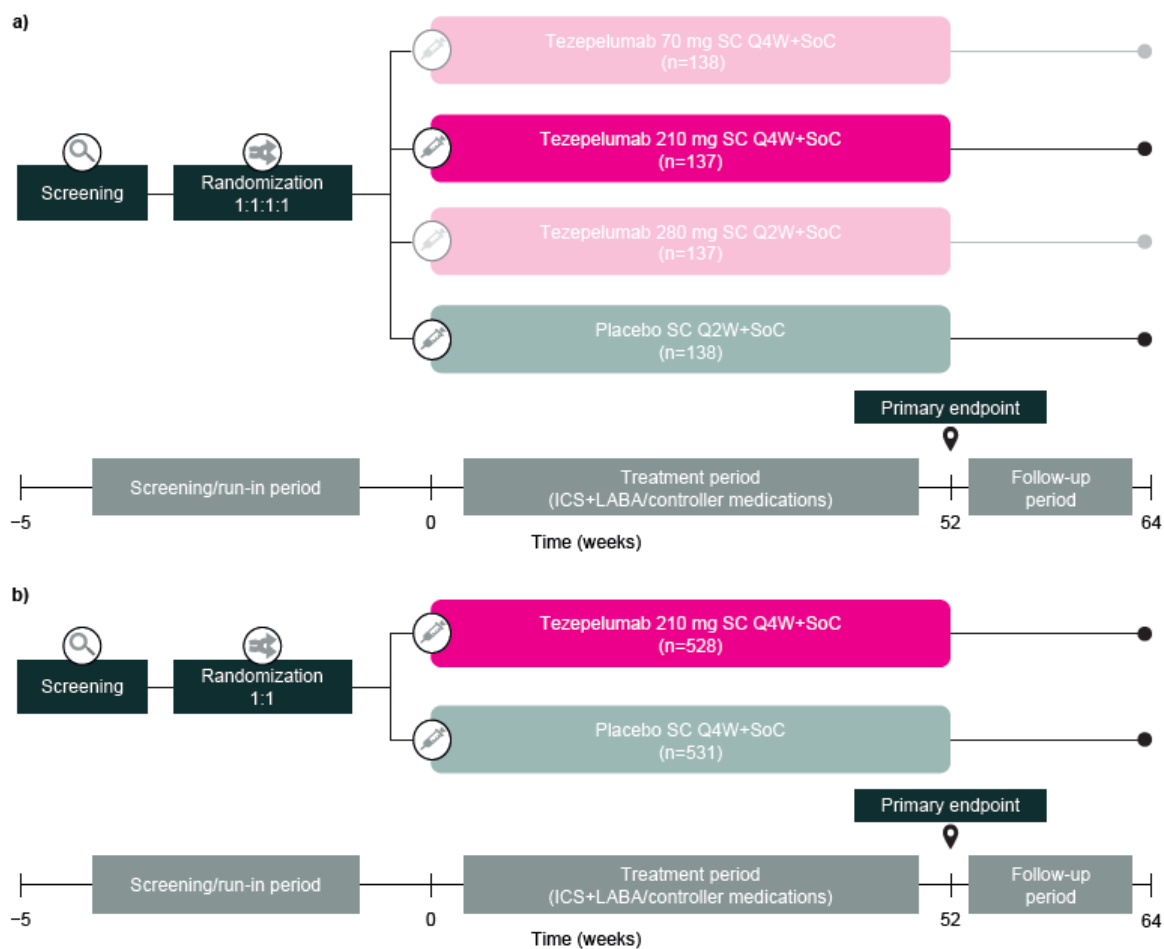

**SUPPLEMENTARY FIGURE S1 PATHWAY A) and NAVIGATOR B) study designs.**

ICS: inhaled corticosteroid; LABA: long-acting  $\beta$ 2 agonist; Q2W: every 2 weeks; Q4W: every 4 weeks; SC: subcutaneously; SoC: standard of care.

**SUPPLEMENTARY TABLE S1 Baseline demographics and clinical characteristics in patients with and without PAO at baseline by baseline BEC**

| Demographic/characteristic                                       | Patients with PAO                             |                                                     | Patients without PAO                          |                                                     |
|------------------------------------------------------------------|-----------------------------------------------|-----------------------------------------------------|-----------------------------------------------|-----------------------------------------------------|
|                                                                  | BEC <300 cells· $\mu\text{L}^{-1}$<br>(n=411) | BEC $\geq$ 300 cells· $\mu\text{L}^{-1}$<br>(n=371) | BEC <300 cells· $\mu\text{L}^{-1}$<br>(n=350) | BEC $\geq$ 300 cells· $\mu\text{L}^{-1}$<br>(n=202) |
| Age, years, mean (SD)                                            | 55.7 (11.9)                                   | 52.4 (12.8)                                         | 45.8 (16.6)                                   | 41.9 (18.3)                                         |
| Female, n (%)                                                    | 246 (59.9)                                    | 231 (62.3)                                          | 244 (69.7)                                    | 132 (65.3)                                          |
| Age at asthma onset, years,<br>n (%)                             |                                               |                                                     |                                               |                                                     |
| <18                                                              | 131 (31.9)                                    | 106 (28.6)                                          | 127 (36.3)                                    | 86 (42.6)                                           |
| 18–40                                                            | 144 (35.0)                                    | 144 (38.8)                                          | 116 (33.1)                                    | 62 (30.7)                                           |
| >40                                                              | 136 (33.1)                                    | 121 (32.6)                                          | 107 (30.6)                                    | 54 (26.7)                                           |
| Time since asthma<br>diagnosis, years, mean<br>(SD)              | 25.4 (17.3)                                   | 22.0 (15.3)                                         | 18.3 (13.5)                                   | 16.1 (13.4)                                         |
| BMI, kg·m <sup>-2</sup> , mean (SD)                              | 28.9 (6.8)                                    | 27.9 (5.8)                                          | 29.0 (7.1)                                    | 28.0 (7.1)                                          |
| ICS dose, n (%)#                                                 |                                               |                                                     |                                               |                                                     |
| Medium                                                           | 115 (28.0)                                    | 93 (25.1)                                           | 134 (38.3)                                    | 64 (31.7)                                           |
| High                                                             | 295 (71.8)                                    | 278 (74.9)                                          | 216 (61.7)                                    | 138 (68.3)                                          |
| OCS use, n (%)                                                   | 48 (11.7)                                     | 37 (10.0)                                           | 24 (6.9)                                      | 13 (6.4)                                            |
| Number of exacerbations in<br>the past 12 months, per<br>patient |                                               |                                                     |                                               |                                                     |

|                                                                   |                 |                 |               |               |
|-------------------------------------------------------------------|-----------------|-----------------|---------------|---------------|
| Mean (SD)                                                         | 2.7 (1.3)       | 3.0 (1.7)       | 2.5 (1.1)     | 2.7 (1.2)     |
| Median (min, max)                                                 | 2 (1, 12)       | 2 (1, 15)       | 2 (1, 10)     | 2 (1, 10)     |
| Pre-bronchodilator FEV <sub>1</sub> , L, mean (SD)                | 1.60 (0.56)     | 1.53 (0.52)     | 2.19 (0.66)   | 2.28 (0.74)   |
| Post-bronchodilator FEV <sub>1</sub> , L, mean (SD)               | 1.83 (0.63)     | 1.79 (0.61)     | 2.49 (0.72)   | 2.62 (0.77)   |
| Percent predicted pre-bronchodilator FEV <sub>1</sub> , mean (SD) | 55.87 (14.10)   | 52.25 (14.02)   | 73.27 (13.35) | 73.34 (16.13) |
| Pre-bronchodilator FVC, L, mean (SD)                              | 2.89 (0.94)     | 2.86 (0.92)     | 2.97 (0.87)   | 3.08 (0.94)   |
| Post-bronchodilator FVC, L, mean (SD)                             | 3.17 (0.97)     | 3.16 (1.00)     | 3.16 (0.88)   | 3.31 (0.94)   |
| Pre-bronchodilator FEV <sub>1</sub> /FVC %, mean (SD)             | 55.61 (9.14)    | 54.05 (9.27)    | 74.01 (8.27)  | 74.22 (8.42)  |
| Post-bronchodilator FEV <sub>1</sub> /FVC %, mean (SD)            | 57.93 (9.16)    | 57.00 (9.00)    | 78.74 (6.63)  | 79.19 (6.97)  |
| FEV <sub>1</sub> reversibility, L, mean (SD)                      | 50.9 (149.1)    | 79.2 (203.2)    | 90.8 (264.8)  | 114.1 (305.7) |
| FEV <sub>1</sub> reversibility, %, mean (SD)                      | 15.83 (14.59)   | 18.42 (17.83)   | 14.87 (16.12) | 16.59 (17.41) |
| Serum total IgE, IU/mL, median (min, max)                         | 125 (2, 12 823) | 228 (2, 11 430) | 139 (2, 5995) | 260 (3, 9741) |

|                                                  |                   |                   |                   |                   |
|--------------------------------------------------|-------------------|-------------------|-------------------|-------------------|
| BEC, cells· $\mu\text{L}^{-1}$ ,<br>median (IQR) | 170 (100–230)     | 490 (370–710)     | 150 (100–220)     | 470 (370–640)     |
| FeNO, ppb,<br>median (min, max)                  | 24.0 (4.0, 210.0) | 38.0 (5.0, 276.3) | 20.3 (5.0, 216.0) | 45.0 (3.5, 265.0) |

BEC: blood eosinophil count; BMI: body mass index; FeNO: fractional exhaled nitric oxide; FEV<sub>1</sub>: forced expiratory volume in 1 second; FVC: forced vital capacity; ICS: inhaled corticosteroid; IgE: immunoglobulin E; IQR: interquartile range; OCS: oral corticosteroid; PAO: persistent airflow obstruction; SD: standard deviation.

#Medium-dose ICS: fluticasone propionate 250–500  $\mu\text{g}/\text{day}$  or equivalent; high-dose ICS: fluticasone propionate >500  $\mu\text{g}/\text{day}$  or equivalent.

There was one patient in NAVIGATOR with PAO and a BEC <300 cells· $\mu\text{L}^{-1}$  (placebo group) who received fluticasone propionate <500  $\mu\text{g}/\text{day}$  or equivalent at baseline.

1 **SUPPLEMENTARY TABLE S2 Baseline demographics and clinical characteristics in patients with and without PAO at baseline by**  
2 **baseline FeNO level**

| Demographic/characteristic                                       | Patients with PAO       |                         | Patients without PAO    |                         |
|------------------------------------------------------------------|-------------------------|-------------------------|-------------------------|-------------------------|
|                                                                  | FeNO <25 ppb<br>(n=324) | FeNO ≥25 ppb<br>(n=453) | FeNO <25 ppb<br>(n=261) | FeNO ≥25 ppb<br>(n=283) |
| Age, years, mean (SD)                                            | 55.1 (11.9)             | 53.2 (12.8)             | 45.5 (16.4)             | 42.9 (18.0)             |
| Female, n (%)                                                    | 208 (64.2)              | 265 (58.5)              | 183 (70.1)              | 187 (66.1)              |
| Age at asthma onset, years,<br>n (%)                             |                         |                         |                         |                         |
| <18                                                              | 115 (35.5)              | 122 (26.9)              | 95 (36.4)               | 117 (41.3)              |
| 18–40                                                            | 107 (33.0)              | 180 (39.7)              | 95 (36.4)               | 79 (27.9)               |
| >40                                                              | 102 (31.5)              | 151 (33.3)              | 71 (27.2)               | 87 (30.7)               |
| Time since asthma<br>diagnosis, years, mean<br>(SD)              | 25.8 (16.9)             | 22.4 (16.1)             | 18.9 (13.9)             | 16.2 (13.0)             |
| BMI, kg·m <sup>-2</sup> , mean (SD)                              | 29.4 (6.5)              | 27.7 (6.2)              | 29.3 (7.1)              | 28.0 (7.0)              |
| ICS dose, n (%)#                                                 |                         |                         |                         |                         |
| Medium                                                           | 93 (28.7)               | 114 (25.2)              | 110 (42.1)              | 85 (30.0)               |
| High                                                             | 230 (71.0)              | 339 (74.8)              | 151 (57.9)              | 198 (70.0)              |
| OCS use, n (%)                                                   | 28 (8.6)                | 57 (12.6)               | 12 (4.6)                | 25 (8.8)                |
| Number of exacerbations in<br>the past 12 months, per<br>patient |                         |                         |                         |                         |

|                                                                   |                 |                 |               |               |
|-------------------------------------------------------------------|-----------------|-----------------|---------------|---------------|
| Mean (SD)                                                         | 2.7 (1.5)       | 2.9 (1.5)       | 2.5 (1.1)     | 2.6 (1.1)     |
| Median (min, max)                                                 | 2 (1, 15)       | 2 (1, 13)       | 2 (1, 10)     | 2 (1, 8)      |
| Pre-bronchodilator FEV <sub>1</sub> , L, mean (SD)                | 1.52 (0.53)     | 1.60 (0.55)     | 2.17 (0.64)   | 2.29 (0.73)   |
| Post-bronchodilator FEV <sub>1</sub> , L, mean (SD)               | 1.75 (0.59)     | 1.86 (0.63)     | 2.46 (0.68)   | 2.62 (0.78)   |
| Percent predicted pre-bronchodilator FEV <sub>1</sub> , mean (SD) | 54.06 (14.65)   | 54.15 (13.83)   | 72.26 (14.14) | 74.42 (14.60) |
| Pre-bronchodilator FVC, L, mean (SD)                              | 2.77 (0.90)     | 2.95 (0.94)     | 2.91 (0.86)   | 3.13 (0.92)   |
| Post-bronchodilator FVC, L, mean (SD)                             | 3.05 (0.94)     | 3.25 (0.99)     | 3.10 (0.84)   | 3.34 (0.95)   |
| Pre-bronchodilator FEV <sub>1</sub> /FVC %, mean (SD)             | 55.38 (9.74)    | 54.48 (8.85)    | 74.91 (8.49)  | 73.36 (8.20)  |
| Post-bronchodilator FEV <sub>1</sub> /FVC %, mean (SD)            | 57.60 (9.58)    | 57.40 (8.78)    | 79.29 (6.81)  | 78.60 (6.74)  |
| FEV <sub>1</sub> reversibility, L, mean (SD)                      | 68.0 (168.2)    | 62.5 (184.5)    | 121.4 (298.9) | 79.0 (264.4)  |
| FEV <sub>1</sub> reversibility, %, mean (SD)                      | 16.12 (16.38)   | 17.79 (16.18)   | 15.05 (17.47) | 15.95 (15.91) |
| Serum total IgE, IU/mL, median (min, max)                         | 152 (2, 12 823) | 207 (2, 11 860) | 123 (2, 5995) | 258 (2, 9741) |

|                                                  |                  |                    |                  |                    |
|--------------------------------------------------|------------------|--------------------|------------------|--------------------|
| BEC, cells· $\mu\text{L}^{-1}$ ,<br>median (IQR) | 220 (130–385)    | 320 (200–560)      | 170 (100–280)    | 300 (170–490)      |
| FeNO, ppb,<br>median (min, max)                  | 14.0 (4.0, 24.5) | 48.0 (25.0, 276.3) | 14.0 (3.5, 24.0) | 53.0 (25.0, 265.0) |

- 3 BEC: blood eosinophil count; BMI: body mass index; FeNO: fractional exhaled nitric oxide; FEV<sub>1</sub>: forced expiratory volume in 1 second; FVC:  
4 forced vital capacity; ICS: inhaled corticosteroid; IgE: immunoglobulin E; IQR: interquartile range; OCS: oral corticosteroid; PAO: persistent  
5 airflow obstruction; SD: standard deviation.
- 6 #Medium-dose ICS: fluticasone propionate 250–500  $\mu\text{g}/\text{day}$  or equivalent; high-dose ICS: fluticasone propionate >500  $\mu\text{g}/\text{day}$  or equivalent.
- 7 There was one patient in NAVIGATOR with PAO and a FeNO level <25 ppb (placebo group) who received fluticasone propionate <500  $\mu\text{g}/\text{day}$   
8 or equivalent.

9 SUPPLEMENTARY TABLE S3 Sensitivity analyses in patients with and without PAO at screening/run-in and baseline

|                                                                                  | Tezepelumab<br>210 mg Q4W |     |                                      | Placebo                |     |                                      | Tezepelumab 210<br>mg Q4W vs placebo |
|----------------------------------------------------------------------------------|---------------------------|-----|--------------------------------------|------------------------|-----|--------------------------------------|--------------------------------------|
| <b>Change in pre-bronchodilator FEV<sub>1</sub> from baseline to week 52, L</b>  |                           |     |                                      |                        |     |                                      |                                      |
|                                                                                  | Baseline,<br>mean (SD)    | n   | LS mean (SE) change<br>from baseline | Baseline,<br>mean (SD) | n   | LS mean (SE) change<br>from baseline | LS mean difference<br>(95% CI)       |
| <b>Patients with PAO<br/>at screening/run-<br/>in and baseline</b>               | 1.52 (0.52)               | 333 | 0.23 (0.023)                         | 1.59 (0.56)            | 335 | 0.05 (0.023)                         | 0.17 (0.11, 0.24)                    |
| <b>Patients without<br/>PAO at<br/>screening/run-in<br/>and baseline</b>         | 2.18 (0.70)               | 288 | 0.22 (0.025)                         | 2.15 (0.69)            | 293 | 0.13 (0.025)                         | 0.09 (0.03, 0.16)                    |
| <b>Change in post-bronchodilator FEV<sub>1</sub> from baseline to week 52, L</b> |                           |     |                                      |                        |     |                                      |                                      |
|                                                                                  | Baseline,<br>mean (SD)    | n   | LS mean (SE) change<br>from baseline | Baseline,<br>mean (SD) | n   | LS mean (SE) change<br>from baseline | LS mean difference<br>(95% CI)       |
| <b>Patients with PAO<br/>at screening/run-<br/>in and baseline</b>               | 1.76 (0.59)               | 307 | 0.17 (0.022)                         | 1.84 (0.64)            | 300 | 0.01 (0.022)                         | 0.16 (0.10, 0.21)                    |
| <b>Patients without<br/>PAO at</b>                                               | 2.48 (0.77)               | 259 | 0.10 (0.024)                         | 2.47 (0.73)            | 259 | 0.02 (0.024)                         | 0.09 (0.02, 0.15)                    |



---

**screening/run-in  
and baseline**

---

**AAER over 52 weeks**

|                                                                          | n   | Rate (95% CI)     | n   | Rate (95% CI)     | Rate ratio (95% CI) |
|--------------------------------------------------------------------------|-----|-------------------|-----|-------------------|---------------------|
| <b>Patients with PAO<br/>at screening/run-<br/>in and baseline</b>       | 336 | 0.82 (0.67, 0.99) | 336 | 2.18 (1.83, 2.58) | 0.38 (0.29, 0.48)   |
| <b>Patients without<br/>PAO at<br/>screening/run-in<br/>and baseline</b> | 290 | 0.70 (0.56, 0.87) | 294 | 1.61 (1.33, 1.94) | 0.43 (0.33, 0.57)   |

---

**Proportion of patients with PAO at screening/run-in and baseline who no longer had PAO at week 52**

---

|  | Proportion of patients<br>who transitioned,<br>% (n/N) | Proportion of patients<br>who transitioned,<br>% (n/N) | Odds ratio (95% CI) |
|--|--------------------------------------------------------|--------------------------------------------------------|---------------------|
|  | 8.8 (50/566)                                           | 4.7 (26/559)                                           | 2.00 (1.22, 3.26)   |

10 AAER: annualized asthma exacerbation rate; CI: confidence interval; FEV<sub>1</sub>: forced expiratory volume in 1 second; LS: least-squares; PAO:  
11 persistent airflow obstruction; Q4W: every 4 weeks; SD: standard deviation; SE: standard error.

12 A total of 672 patients (tezepelumab, n=336; placebo, n=336) had PAO at screening/run-in and baseline and 584 did not (tezepelumab, n=290;  
13 placebo, n=294); 78 patients (tezepelumab, n=39; placebo, n=39) had missing data at screening/run-in.

14 **SUPPLEMENTARY TABLE S4 Baseline demographics and clinical characteristics of placebo recipients grouped by whether they had**  
 15 **PAO at baseline and/or week 52**

| <b>Demographic/characteristic</b>                          | <b>Patients with PAO at baseline and at week 52<br/>(n=309)</b> | <b>Patients without PAO at baseline or at week 52<br/>(n=200)</b> | <b>Patients without PAO at baseline and with PAO at week 52<br/>(n=42)</b> | <b>Patients with PAO at baseline and without PAO at week 52<br/>(n=39)</b> |
|------------------------------------------------------------|-----------------------------------------------------------------|-------------------------------------------------------------------|----------------------------------------------------------------------------|----------------------------------------------------------------------------|
| Age, years, mean (SD)                                      | 54.7 (11.5)                                                     | 42.7 (17.0)                                                       | 51.4 (15.5)                                                                | 46.8 (13.4)                                                                |
| Female, n (%)                                              | 181 (58.6)                                                      | 150 (75.0)                                                        | 22 (52.4)                                                                  | 27 (69.2)                                                                  |
| Time since asthma diagnosis, years, mean (SD)              | 23.4 (16.2)                                                     | 17.3 (12.9)                                                       | 20.6 (16.1)                                                                | 21.2 (14.5)                                                                |
| BMI, kg·m <sup>-2</sup> , mean (SD)                        | 28.2 (6.1)                                                      | 28.7 (7.5)                                                        | 27.9 (7.0)                                                                 | 29.04 (6.99)                                                               |
| ICS dose, n (%)#                                           |                                                                 |                                                                   |                                                                            |                                                                            |
| Medium                                                     | 96 (31.1)                                                       | 74 (37.0)                                                         | 13 (31.0)                                                                  | 10 (25.6)                                                                  |
| High                                                       | 212 (68.6)                                                      | 126 (63.0)                                                        | 29 (69.0)                                                                  | 29 (74.4)                                                                  |
| OCS use, n (%)                                             | 32 (10.4)                                                       | 12 (6.0)                                                          | 3 (7.1)                                                                    | 1 (2.6)                                                                    |
| Number of exacerbations in the past 12 months, per patient |                                                                 |                                                                   |                                                                            |                                                                            |
| Mean (SD)                                                  | 2.8 (1.5)                                                       | 2.4 (0.9)                                                         | 2.5 (1.1)                                                                  | 2.7 (1.3)                                                                  |
| Median (min, max)                                          | 2.0 (1, 11)                                                     | 2.0 (1, 6)                                                        | 2.0 (1, 8)                                                                 | 2.0 (1, 8)                                                                 |
| Pre-bronchodilator FEV <sub>1</sub> , L, mean (SD)         | 1.58 (0.54)                                                     | 2.25 (0.69)                                                       | 2.13 (0.67)                                                                | 1.69 (0.60)                                                                |

|                                                                   |                 |                 |               |                 |
|-------------------------------------------------------------------|-----------------|-----------------|---------------|-----------------|
| Post-bronchodilator FEV <sub>1</sub> , L, mean (SD)               | 1.84 (0.62)     | 2.58 (0.72)     | 2.41 (0.73)   | 1.99 (0.75)     |
| Percent predicted pre-bronchodilator FEV <sub>1</sub> , mean (SD) | 54.68 (14.24)   | 74.06 (14.73)   | 70.29 (11.60) | 56.22 (11.38)   |
| Pre-bronchodilator FVC, L, mean (SD)                              | 2.93 (0.96)     | 3.00 (0.84)     | 3.14 (1.00)   | 2.76 (1.01)     |
| Post-bronchodilator FVC, L, mean (SD)                             | 3.23 (1.02)     | 3.23 (0.86)     | 3.24 (0.93)   | 3.06 (1.11)     |
| Pre-bronchodilator FEV <sub>1</sub> /FVC %, mean (SD)             | 54.46 (8.31)    | 75.18 (8.16)    | 68.52 (7.34)  | 61.99 (7.68)    |
| Post-bronchodilator FEV <sub>1</sub> /FVC %, mean (SD)            | 57.05 (8.37)    | 79.79 (6.92)    | 74.06 (5.07)  | 64.91 (4.90)    |
| Reversibility in FEV <sub>1</sub> , L, mean (SD)                  | 71.99 (193.91)  | 120.65 (309.16) | 24.15 (83.53) | 119.36 (259.37) |
| FEV <sub>1</sub> percent reversibility, n (%)                     |                 |                 |               |                 |
| <12                                                               | 136 (44.0)      | 100 (50.0)      | 24 (57.1)     | 15 (38.5)       |
| ≥12 and <15                                                       | 29 (9.4)        | 14 (7.0)        | 5 (11.9)      | 6 (15.4)        |
| ≥15                                                               | 144 (46.6)      | 86 (43.0)       | 13 (31.0)     | 18 (46.2)       |
| Serum total IgE, IU/mL, median (min, max)                         | 161 (2, 11 860) | 179 (2, 9741)   | 231 (3, 2337) | 195 (6, 7406)   |
| FEIA positive for any perennial aeroallergen, n (%) <sup>†</sup>  | 177 (57.3)      | 127 (63.5)      | 26 (61.9)     | 27 (69.2)       |

|                                                  |                   |                   |                   |                   |
|--------------------------------------------------|-------------------|-------------------|-------------------|-------------------|
| BEC, cells· $\mu\text{L}^{-1}$ ,<br>median (IQR) | 280 (150–460)     | 240 (130–400)     | 180 (130–340)     | 360 (140–690)     |
| FeNO, ppb,<br>median (min, max)                  | 29.0 (5.0, 276.3) | 24.0 (3.5, 231.0) | 31.5 (5.0, 176.0) | 32.0 (6.0, 258.0) |

16 BEC: blood eosinophil count; BMI: body mass index; FEIA: fluorescence enzyme immunoassay; FeNO: fractional exhaled nitric oxide; FEV<sub>1</sub>:  
17 forced expiratory volume in 1 second; FVC: forced vital capacity; ICS: inhaled corticosteroid; IgE: immunoglobulin E; IQR: interquartile range;  
18 OCS: oral corticosteroid; PAO: persistent airflow obstruction; SD: standard deviation.

19 #Medium-dose ICS: fluticasone propionate 250–500  $\mu\text{g}/\text{day}$  or equivalent; high-dose ICS: fluticasone propionate >500  $\mu\text{g}/\text{day}$  or equivalent.  
20 There was one patient in NAVIGATOR with PAO (placebo group) who received fluticasone propionate <500  $\mu\text{g}/\text{day}$  or equivalent. <sup>†</sup>Positive for  
21 at least one perennial aeroallergen (cat dander, dog dander, cockroach, dust mite [*Dermatophagoides farinae* or *D. pteronyssinus*] and mould  
22 mix).

23
